# Supplementary material for: The phosphatidylinositol (4,5)-bisphosphate-Rab35 axis regulates migrasome formation
Source: Springer Nature journal article supplement (doi:10.1038/s41422-023-00811-5), 2023-05-04
Supplement: MOESM15 [file 41422_2023_811_MOESM15_ESM.pdf]

### **Supplementary Video 1**

Movie of an NRK cell expressing PH-GFP and TSPAN4-mCherry. Images were collected by SIM at 1 frame/5 min. Scale bar, 10  $\mu\text{m}$ .

## **Supplementary Video 2**

Movie of an NRK cell expressing PIP5K1A-GFP and TSPAN4-mCherry. Images were collected by SIM at 1 frame/8 min. Scale bar, 10  $\mu\text{m}$ .

### **Supplementary Video 3**

Movie showing the migration of WT NRK-TSPAN4-mCherry cells. Images were collected with a confocal microscope at 1 frame/6 min. Scale bar, 20  $\mu\text{m}$ .

#### **Supplementary Video 4**

Movie showing the migration of PIP5K1A-KO NRK-TSPAN4-mCherry cells. Images were collected with a confocal microscope at 1 frame/6 min. Scale bar, 20  $\mu\text{m}$ .

### **Supplementary Video 5**

Movie of an NRK cell expressing TSPAN4-GFP and mCherry-Rab35. Images were collected by SIM at 1 frame/5 min. Scale bar, 10  $\mu\text{m}$ .
